# Supplementary material for: Biodegradation of Crystal Violet dye by bacteria isolated from textile industry effluents
Source: PeerJ journal article supplement (doi:10.7717/peerj.5015), 2018-06-21
Supplement: plate_2.pdf [file plate_2.pdf]

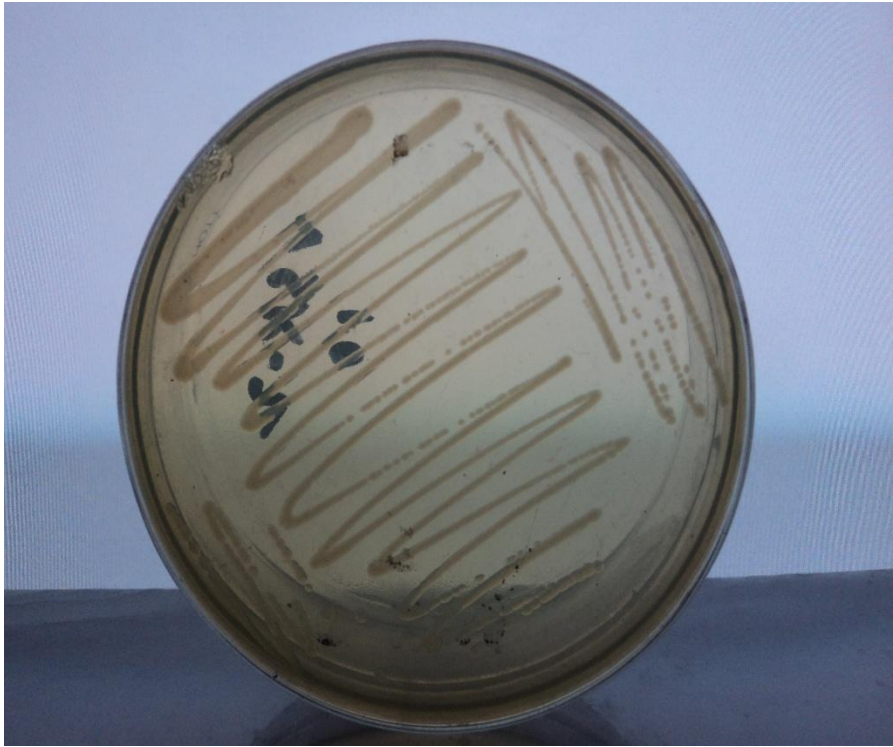

Plate 2: Observation of bacterial growth after 72 hours of incubation with dye solution
